# Supplementary material for: Screening of Specific and Common Pathways in Breast Cancer Cell Lines MCF-7 and MDA-MB-231 Treated with Chlorophyllides Composites
Source: MDPI journal article supplement (doi:10.3390/molecules27123950), 2022-06-20
Supplement: s1 [file s1]

# Screening of Specific and Common pathways in Breast Cancer Cell Lines MCF-7 and MDA-MB-231 Treated with Chlorophyllides Composites

## Supplementary

Figure S1

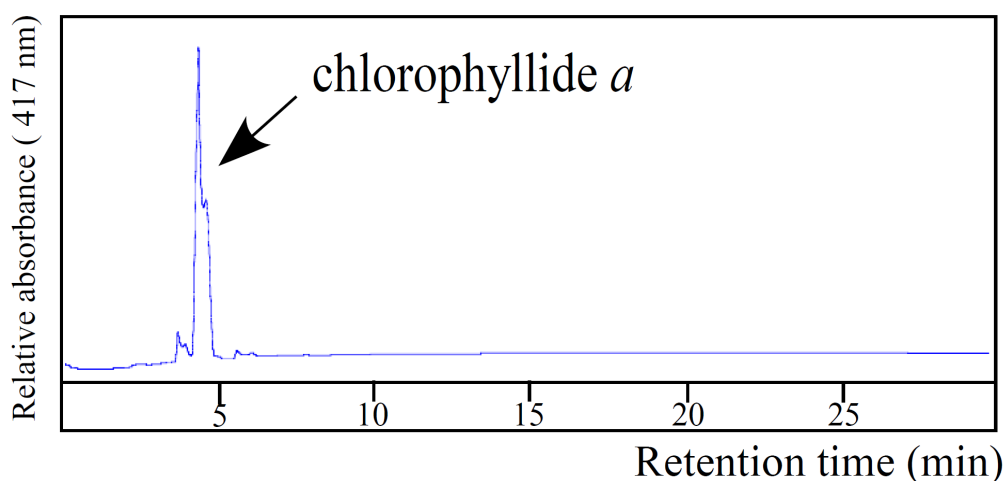

**Figure S1.** HPLC analysis profiles of chlorophyllides composites. The chlorophyllides composites were separated by HPLC and detected at 417 nm from 0 to 80 min. Chlorophyllide *a* was detected within 5 min. Chlorophyllide *a* are > 95% pure by HPLC analysis. The HPLC traces is similar to that from our previous studies<sup>37,38</sup>.
